# Supplementary material for: ATH1 and KNAT2 proteins act together in regulation of plant inflorescence architecture
Source: PubMed Central journal article supplement — J Exp Bot. 2011 Dec 3;63(3):1423–33. doi: 10.1093/jxb/err376 (PMC3276100; doi:10.1093/jxb/err376), 2011-12-03
Supplement: supp_err376_00066142-file001.pdf [file supp_err376_00066142-file001.pdf]

# **ATH1 and KNAT2 proteins act together in regulation of plant inflorescence architecture**

Yang Li   Limin Pi\*   Hai Huang   Lin Xu<sup>#</sup>

National Laboratory of Plant Molecular Genetics, Shanghai Institute of Plant  
Physiology and Ecology, Shanghai Institutes for Biological Sciences, Chinese  
Academy of Sciences, 300 Fenglin Road, Shanghai 200032, China.

**Running Title:** *ATH1* is required for inflorescence architecture

\* Present address: Institute of Biology III, Faculty of Biology, University of Freiburg,  
79104 Freiburg, Germany

<sup>#</sup> Author for correspondence

E-mail: [xulin01@sibs.ac.cn](mailto:xulin01@sibs.ac.cn)

Phone: 86-21-54924085

Fax: 86-21-54924015

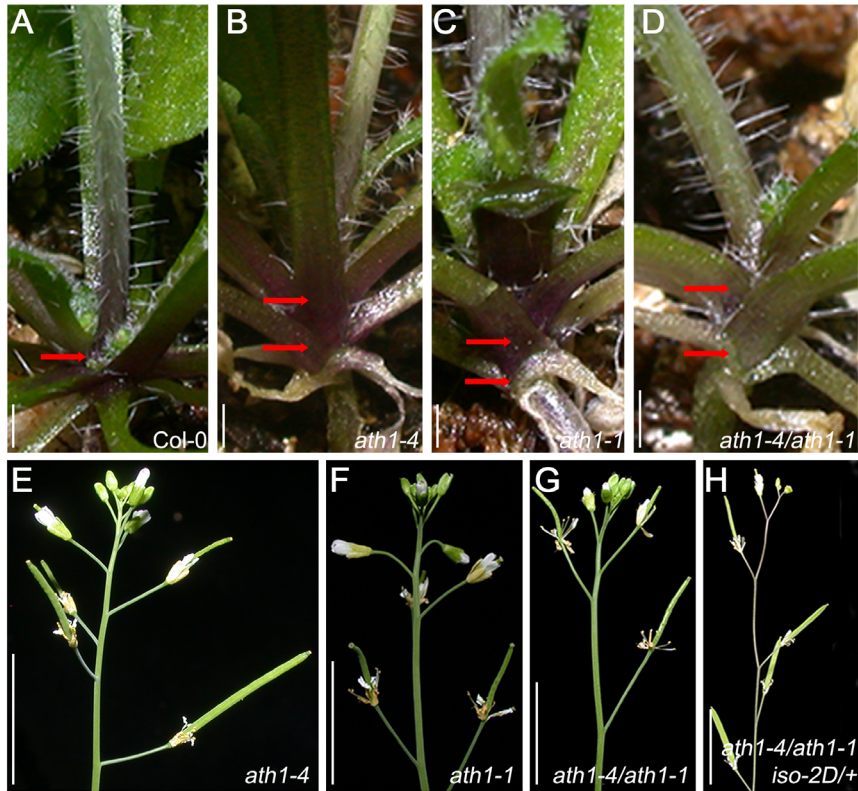

**Fig. S1.** The *iso-2D* suppressor corresponds to the *ATH1* gene. (A-D) The rosette of the wild-type Col-0 plants displays compacted internodes between rosettes leaves (A), whereas rosette internodes in *ath1-4* (B), *ath1-1* (C), and *ath1-4/ath1-1* (D) were elongated (red arrows). (E-H) Another typical *ath1* mutant phenotype is that sepals, petals, and stamens remain attached to the fruits until their maturation. This phenotype was observed in *ath1-4* (E), *ath1-1* (F), *ath1-4/ath1-1* (G), and *ath1-4/ath1-1 iso-2D/+* plants. Bars =0.1 cm in (A) to (D), and 1 cm in (E) to (H).

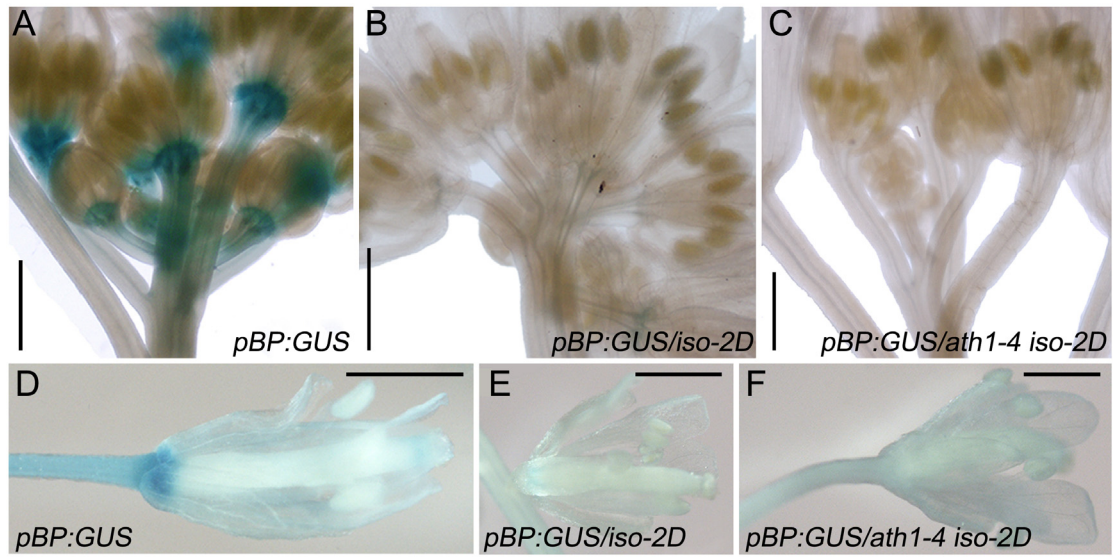

**Fig. S2.** *pBP:GUS* staining in wild-type Col-0 (A, D), *iso-2D* (B, E), and *ath1-4 iso-2D* (C, F). Bars = 0.5 cm.
